# Supplementary material for: A selective and economic carbon catalyst from waste for aqueous conversion of fructose into 5-hydroxymethylfurfural
Source: Royal Society of Chemistry journal article supplement (doi:10.1039/c6ra00154h), 2016-01-01
Supplement: c6ra00154h1.pdf [file c6ra00154h1.pdf]

**Supplementary Material for**

**A Selective and Economic Carbon Catalyst from Waste for Aqueous Conversion  
of Fructose into 5-Hydroxymethylfurfural**

*Tiansheng Deng,<sup>a†</sup> Jiangong Li,<sup>a†</sup> Qiqi Yang,<sup>b</sup> Yongxing Yang,<sup>a</sup> Guangqiang Lv,<sup>a</sup> Ying  
Yao,<sup>c</sup> Limin Qin,<sup>c</sup> Xianlong Zhao,<sup>c</sup> Xiaojing Cui<sup>\*a</sup> and Xianglin Hou<sup>\*a</sup>*

*<sup>a</sup>Institute of Coal Chemistry, Chinese Academy of Science, Taiyuan, P R China.*

*<sup>b</sup>Taiyuan University of Technology, Taiyuan, P R China.*

*<sup>c</sup>Taiyuan Institute of Technology, Taiyuan, P R China.*

*† Authors contributed equally.*

*\*Corresponding author: Institute of Coal Chemistry, Chinese Academy of Sciences,*

*Taiyuan 030001, P R China.; E-mail: [cuixj@sxicc.ac.cn](mailto:cuixj@sxicc.ac.cn), [houxl@sxicc.ac.cn](mailto:houxl@sxicc.ac.cn)*

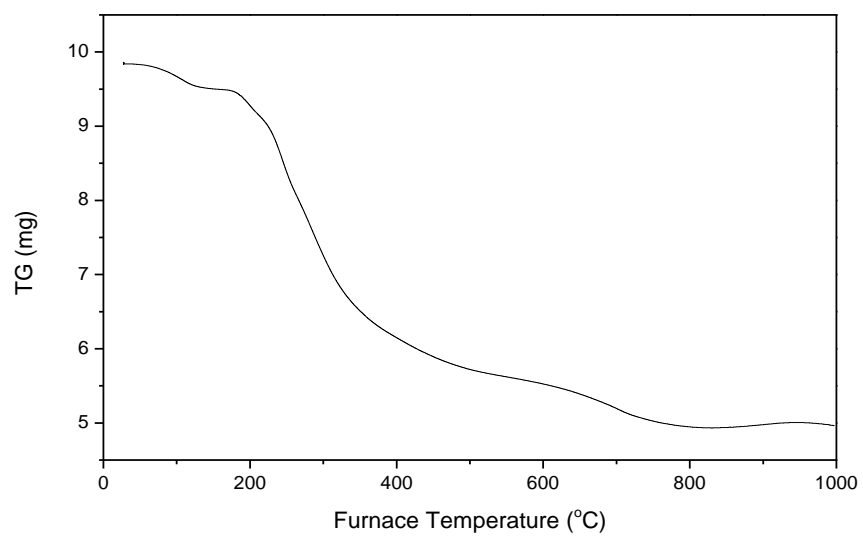

**Fig.1S.** TG-MS spectrum of Sodium Ligninsulfonate (SLS).

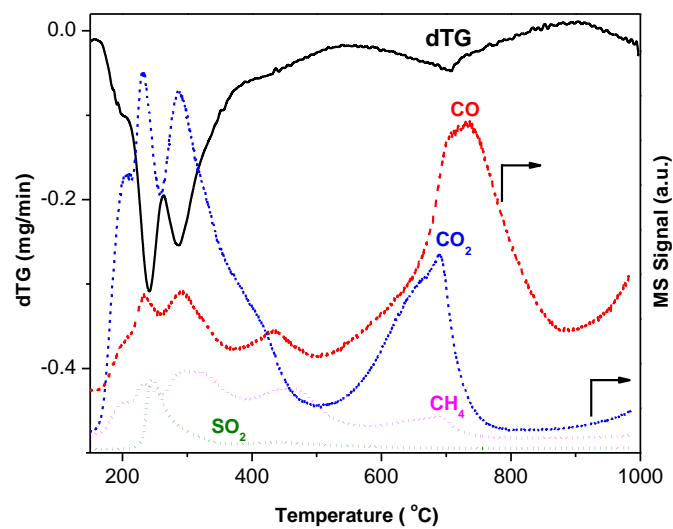

**Fig. 2S.** dTG-MS spectra of Sodium Ligninsulfonate (SLS).

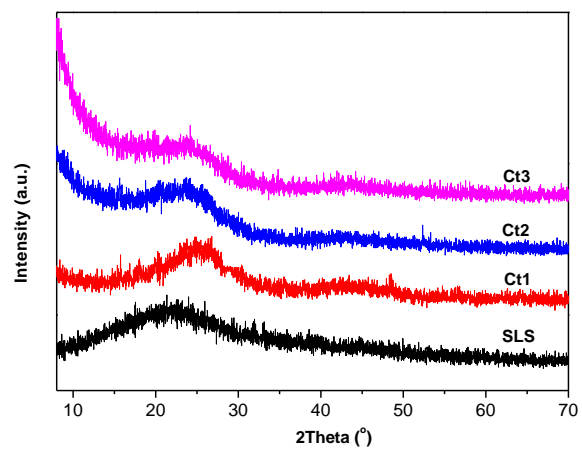

**Fig. 3S.** XRD patterns of SLS and the carbonized catalysts.

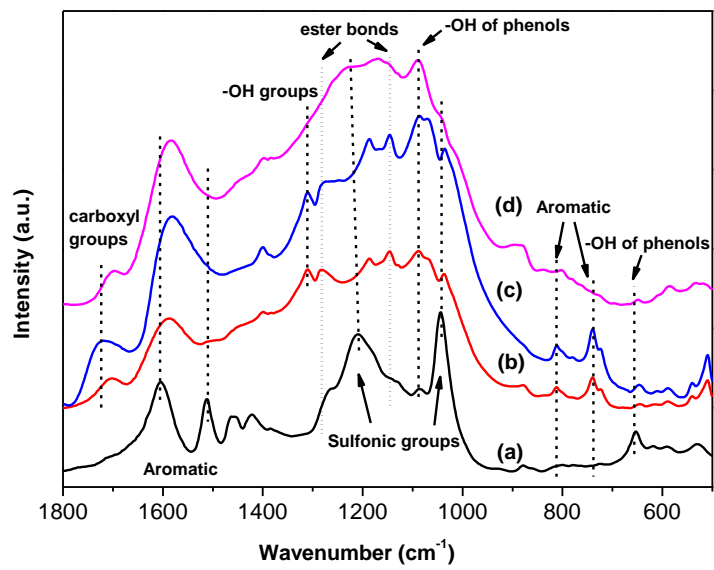

**Fig. 4S.** FT-IR spectra of (a) SLS, (b) Ct1, (c) Ct2, (d) Ct3.

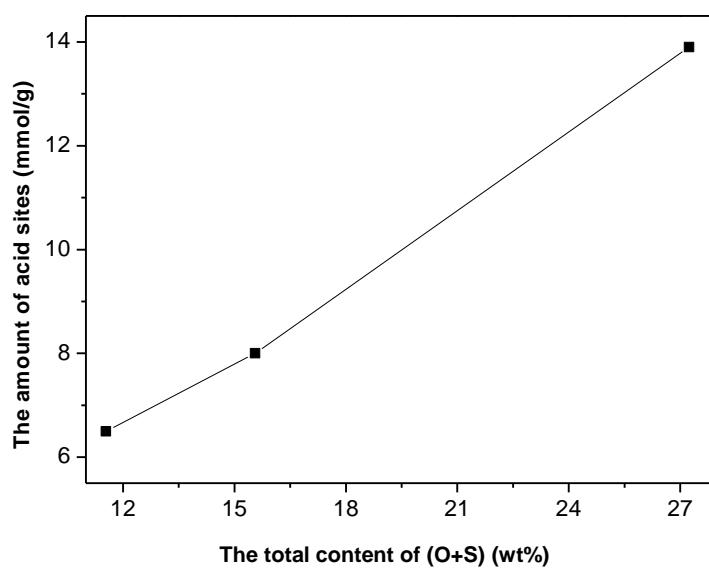

**Fig. 5S.** Correlation of the amount of total acid sites with the total content of (O+S) in the samples.

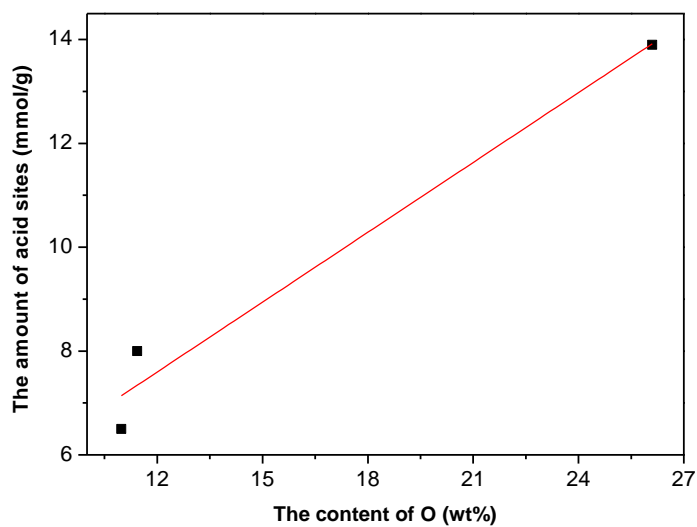

**Fig.6S.** The relationship between the content of oxygen and the amount of total acid sites in the three catalysts.

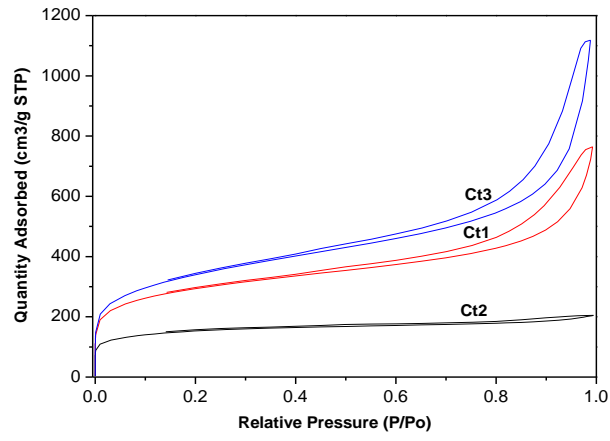

**Fig. 7S.** Nitrogen adsorption-desorption isotherms of the carbonized catalysts.

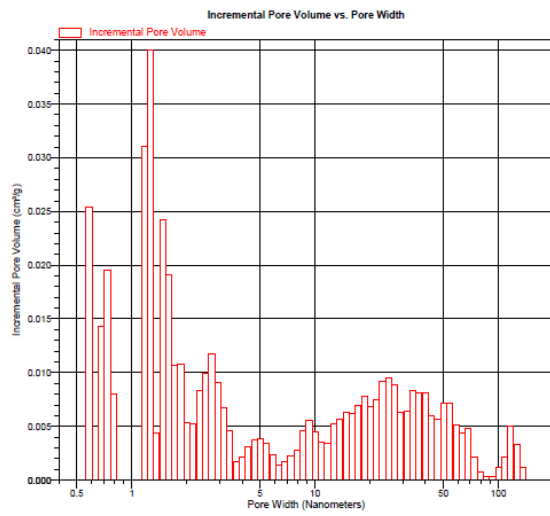

Ct1

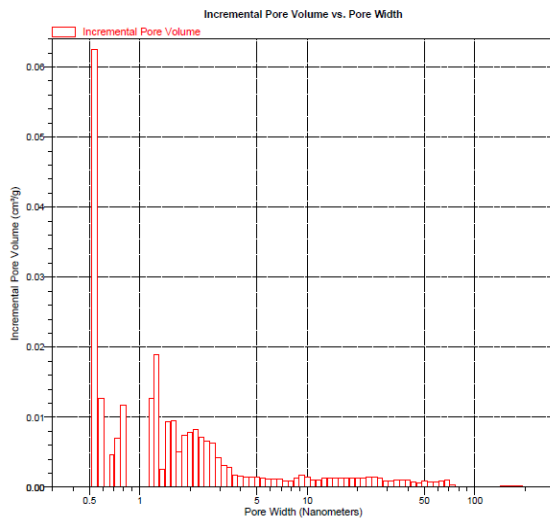

Ct2

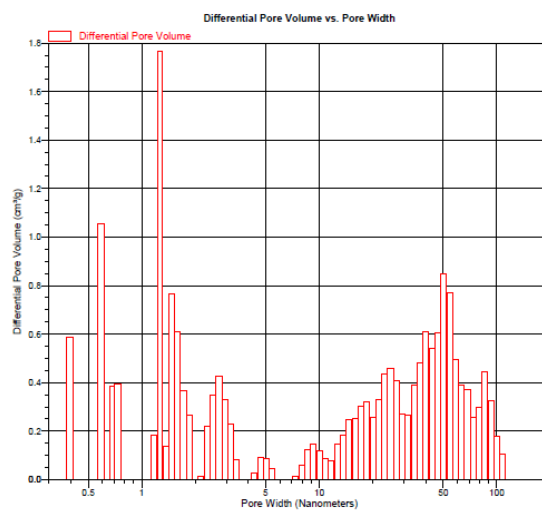

Ct3

**Fig.8S.** Horvath-Kawazoe analysis of pore size distributions of carbonized catalysts.



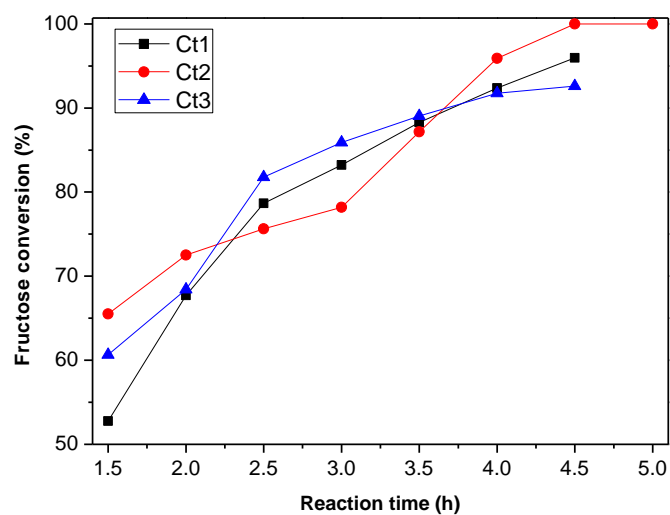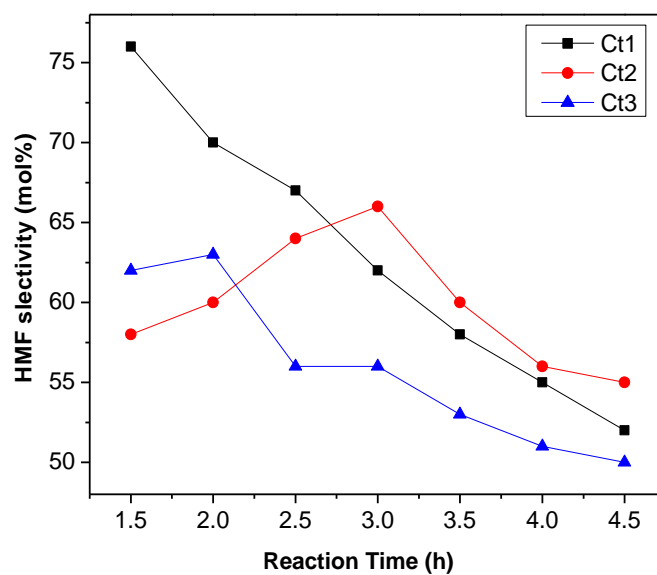

**Fig. 9S.** The fructose conversions and HMF selectivity on the three catalysts.

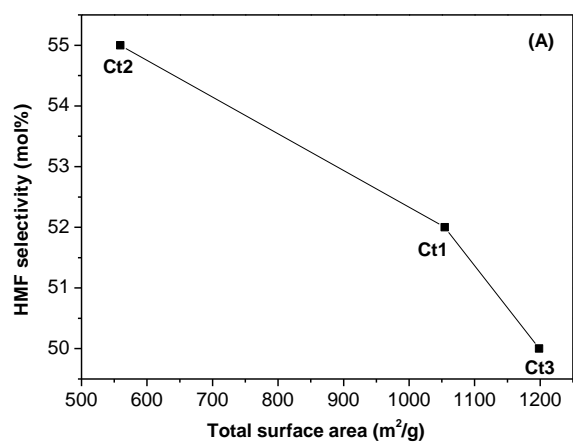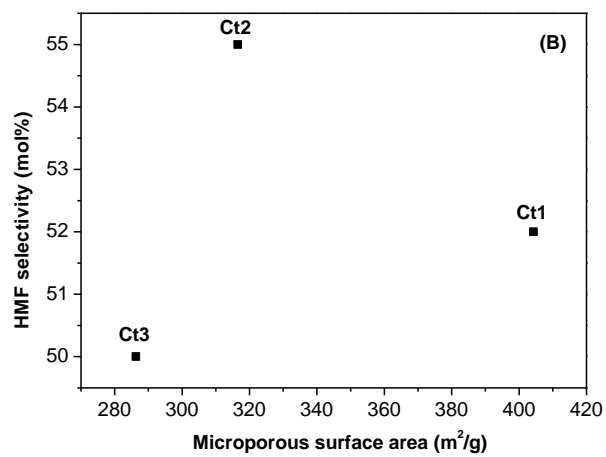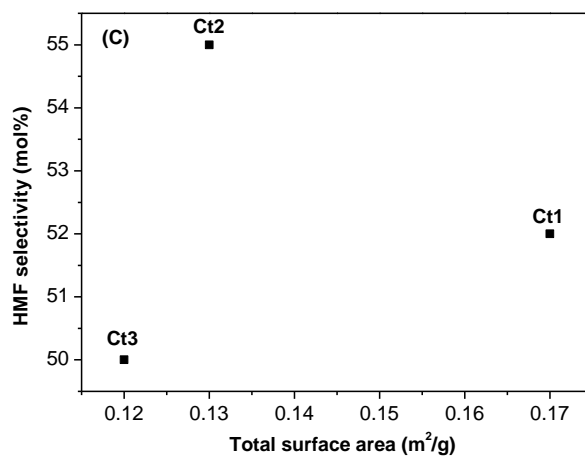

**Fig. 10S.** Correlation between HMF selectivity and (A) the total surface area of the catalysts, (B) the microporous surface area of the catalysts, and (C) the microporous volume of the catalysts.

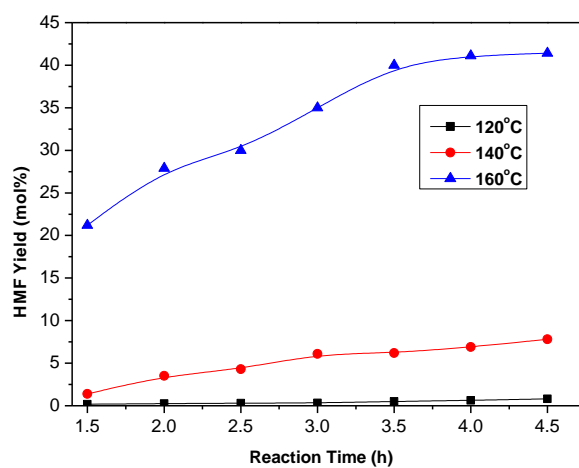

**Fig. 11S.** Effect of temperature of Ct1 on the conversion of fructose into HMF.

Reaction condition: 5 mg Ct1, 5 ml water, 1.0 mmol fructose.

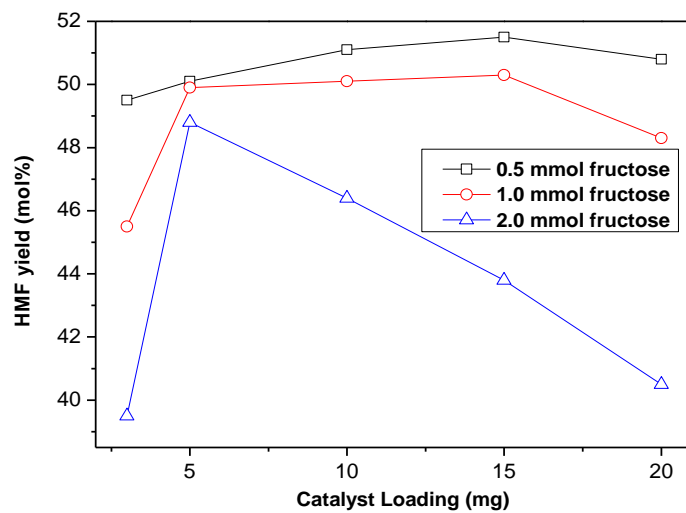

**Fig. 12S.** Effects of catalyst loading on HMF yield under various fructose concentrations. Reaction condition: Ct1, 170 °C, 5ml water, 4.5 h.

**Table 1S** The effect of atmosphere on the weight of SLS after carbonization

| Catalyst | Atmosphere                | Overall Yield (wt%) |
|----------|---------------------------|---------------------|
| Ct1      | Static air                | 25%                 |
| Ct2      | 80 ml/min, air            | 8%                  |
| Ct3      | 80 ml/min, N <sub>2</sub> | 35%                 |

**Table 2S** Elemental results of SLS and carbon catalysts

| Catalyst | C     | O     | S    | P      |
|----------|-------|-------|------|--------|
| Ct1      | 81.49 | 11.43 | 4.13 | 0.19   |
| Ct2      | 55.57 | 26.10 | 1.14 | 0.38   |
| Ct3      | 77.45 | 10.98 | 0.56 | 0.36   |
| SLS      | 42.94 | 38.59 | 6.58 | 0.0044 |
